# Supplementary material for: Anabaenopeptins: What We Know So Far
Source: MDPI journal article supplement (doi:10.3390/toxins13080522), 2021-07-26
Supplement: s1 [file s1]

# Anabaenopeptins: What We Know So Far

Patrick Romano Monteiro, Samuel Cavalcante do Amaral, Andrei Santos Siqueira, Luciana Pereira Xavier and Agenor Valadares Santos

**Table S1.** Sequence composition of Anabaenopeptins. Amino acids are considered in L-configuration, unless otherwise defined.

| Nomenclature   |      | Position |       |     |       |       |       | References |
|----------------|------|----------|-------|-----|-------|-------|-------|------------|
|                |      | 1        | 2     | 3   | 4     | 5     | 6     |            |
| Anabaenopeptin | 679  | -        | D-Lys | Val | Hty   | MeAla | Phe   | [53]       |
| Anabaenopeptin | 731  | Phe      | D-Lys | Val | Leu   | MeGly | AcSer | [81]       |
| Anabaenopeptin | 788  | Val      | D-Lys | Val | Trp   | MeAla | Phe   | [74]       |
| Anabaenopeptin | 803  | Leu      | D-Lys | Met | Leu   | MeIle | MetO  | [81]       |
| Anabaenopeptin | 807  | Ile      | D-Lys | Ile | Hty   | MeAla | Phe   | [14,34]    |
| Anabaenopeptin | 813  | Phe      | D-Lys | Val | Hty   | MeGly | Phe   | [34]       |
| Anabaenopeptin | 816  | Leu      | D-Lys | Leu | Trp   | MeAla | Phe   | [74]       |
| Anabaenopeptin | 828  | Tyr      | D-Lys | Val | Hph   | MeAla | Phe   | [75]       |
| Anabaenopeptin | 842  | Tyr      | D-Lys | Ile | Hph   | MeAla | Phe   | [75]       |
| Anabaenopeptin | 848  | Leu      | D-Lys | Ile | MeHph | MeAsn | Phe   | [24]       |
| Anabaenopeptin | 849  | Lys      | D-Lys | Ile | Hph   | MeAsn | Phe   | [24]       |
| Anabaenopeptin | 852  | MeHty    | D-Lys | Val | Hty   | MeAla | MeLeu | [84]       |
| Anabaenopeptin | 855  | Phe      | D-Lys | Ile | Hph   | MeAla | Hty   | [24]       |
| Anabaenopeptin | 856  | MeHty    | D-Lys | Val | Hph   | MeAla | Phe   | [84]       |
| Anabaenopeptin | 857  | Phe      | D-Lys | Val | Hty   | MeAla | Hty   | [24]       |
| Anabaenopeptin | 862  | Leu      | D-Lys | Ile | EtHph | MeAsn | Phe   | [24]       |
| Anabaenopeptin | 863  | Lys      | D-Lys | Ile | MeHph | MeAsn | Phe   | [24]       |
| Anabaenopeptin | 866  | MeHty    | D-Lys | Ile | Hty   | MeAla | MeLeu | [84]       |
| Anabaenopeptin | 870  | MeHty    | D-Lys | Ile | Hph   | MeAla | Phe   | [84]       |
| Anabaenopeptin | 871  | Phe      | D-Lys | Ile | Hty   | MeAla | Hty   | [24]       |
| Anabaenopeptin | 872  | MeHty    | D-Lys | Val | Hty   | MeAla | Phe   | [84]       |
| Anabaenopeptin | 882  | Phe      | D-Lys | Ile | MeHph | MeAsn | Phe   | [24]       |
| Anabaenopeptin | 886  | MeHty    | D-Lys | Ile | Hty   | MeAla | Phe   | [84]       |
| Anabaenopeptin | 891  | Arg      | D-Lys | Ile | MeHph | MeAsn | Phe   | [24]       |
| Anabaenopeptin | 896  | Phe      | D-Lys | Ile | EtHph | MeAsn | Phe   | [24]       |
| Anabaenopeptin | 899  | Phe      | D-Lys | Val | Hty   | MeHty | Ile   | [70]       |
| Anabaenopeptin | 900  | MeHty    | D-Lys | Ile | Hty   | MeAla | MePhe | [84]       |
| Anabaenopeptin | 905  | Arg      | D-Lys | Ile | EtHph | MeAsn | Phe   | [24]       |
| Anabaenopeptin | 915  | Tyr      | D-Lys | Val | Hty   | MeHty | Ile   | [62,63,76] |
| Anabaenopeptin | 802A | Val      | D-Lys | Ile | Trp   | MeAla | Phe   | [24,74]    |
| Anabaenopeptin | 802B | Val      | D-Lys | Leu | Trp   | MeAla | Phe   | [74]       |
| Anabaenopeptin | 841A | Phe      | D-Lys | Ile | Hty   | MeAla | Phe   | [14]       |
| Anabaenopeptin | 841B | Phe      | D-Lys | Val | Hph   | MeAla | Hty   | [24]       |
| Anabaenopeptin | 877B | Lys      | D-Lys | Ile | EtHph | MeAsn | Phe   | [24]       |
| Anabaenopeptin | 877A | Arg      | D-Lys | Ile | Hph   | MeAsn | Phe   | [24]       |
| Anabaenopeptin | 908A | Arg      | D-Lys | Val | Hty   | MeHty | Ile   | [62,63,83] |
| Anabaenopeptin | 908B | Arg      | D-Lys | Val | Hty   | MeHty | Leu   | [53]       |
| Anabaenopeptin | A    | Tyr      | D-Lys | Val | Hty   | MeAla | Phe   | [44]       |
| Anabaenopeptin | B    | Arg      | D-Lys | Val | Hty   | MeAla | Phe   | [44,48]    |
| Anabaenopeptin | C    | Lys      | D-Lys | Val | Hty   | MeAla | Phe   | [44]       |
| Anabaenopeptin | D    | Phe      | D-Lys | Val | Hty   | MeAla | Phe   | [44]       |

|                   |        |         |       |          |        |                     |        |         |
|-------------------|--------|---------|-------|----------|--------|---------------------|--------|---------|
| Anabaenopeptin    | E      | Arg     | D-Lys | Val      | MeHty  | MeAla               | Phe    | [38]    |
| Anabaenopeptin    | F      | Arg     | D-Lys | Ile      | Hty    | MeAla               | Phe    | [38]    |
| Anabaenopeptin    | G      | Tyr     | D-Lys | Ile      | Hty    | MeHty               | Ile    | [26]    |
| Anabaenopeptin    | H      | Arg     | D-Lys | Ile      | Hty    | MeHty               | Ile    | [26]    |
| Anabaenopeptin    | HU892  | Arg     | D-Lys | Val      | Hph    | MeHty               | Ile    | [61]    |
| Anabaenopeptin    | I      | Ile     | D-Lys | Val      | Hty    | MeAla               | Leu    | [42]    |
| Anabaenopeptin    | J      | Ile     | D-Lys | Val      | Hty    | MeAla               | Phe    | [42]    |
| Anabaenopeptin    | KB899  | Tyr     | D-Lys | Val      | Hph    | MeHty               | Ile    | [62]    |
| Anabaenopeptin    | KB906  | Arg     | D-Lys | Ile      | Hph    | MeHty               | Ile    | [62]    |
| Anabaenopeptin    | KT864  | Harg    | D-Lys | Ile      | Hty    | MeAla               | Phe    | [52]    |
| Anabaenopeptin    | KVJ811 | Phe     | D-Lys | Val      | Hph    | MeGly               | Hph    | [21]    |
| Anabaenopeptin    | KVJ827 | Tyr     | D-Lys | Val      | Hph    | MeGly               | Hph    | [21]    |
| Anabaenopeptin    | KVJ841 | Tyr     | D-Lys | Ile      | Hph    | MeGly               | Hph    | [21]    |
| Anabaenopeptin    | MM823  | O-MeGlu | D-Lys | Val      | Hty    | MeAla               | Phe    | [22]    |
| Anabaenopeptin    | MM850  | O-MeArg | D-Lys | Val      | Hty    | MeAla               | Phe    | [22]    |
| Anabaenopeptin    | MM913  | Tyr     | D-Lys | Ile      | Hph    | MeHty               | Ile    | [22]    |
| Anabaenopeptin    | NZ825  | Phe     | D-Lys | Ile      | Hph    | MeGly               | Hph    | [71]    |
| Anabaenopeptin    | NZ841  | Phe     | D-Lys | Ile      | Hph    | MeGly               | Hty    | [71,83] |
| Anabaenopeptin    | NZ857  | Phe     | D-Lys | Ile      | Hty    | MeGly               | Hty    | [71]    |
| Anabaenopeptin    | SA1    | Arg     | D-Lys | Ile      | PNV    | Asn                 | Phe    | [12]    |
| Anabaenopeptin    | SA10   | Phe     | D-Lys | Val      | Hty    | Gly                 | Cl-Hty | [12]    |
| Anabaenopeptin    | SA11   | Phe     | D-Lys | Ile      | Hty    | Gly                 | Cl-Hty | [12]    |
| Anabaenopeptin    | SA12   | Phe     | D-Lys | Val      | Hty    | Gly                 | Hty    | [12]    |
| Anabaenopeptin    | SA13   | Tyr     | D-Lys | Val      | Hty    | Ser                 | Phe    | [12]    |
| Anabaenopeptin    | SA2    | Arg     | D-Lys | Val      | Hty    | Ser                 | Phe    | [12]    |
| Anabaenopeptin    | SA3    | Lys     | D-Lys | Ile      | Hty    | Ala                 | Phe    | [12]    |
| Anabaenopeptin    | SA4    | Lys     | D-Lys | Ile      | PNV    | Asn                 | Phe    | [12]    |
| Anabaenopeptin    | SA5    | Ile     | D-Lys | Val      | PNV    | Asn                 | Phe    | [12]    |
| Anabaenopeptin    | SA6    | Ile     | D-Lys | Ile      | Hph    | Asn                 | Phe    | [12]    |
| Anabaenopeptin    | SA7    | Ile     | D-Lys | Ile      | PNV    | Asn                 | Phe    | [12]    |
| Anabaenopeptin    | SA8    | Ile     | D-Lys | Ile      | PNL    | Asn                 | Phe    | [12]    |
| Anabaenopeptin    | SA9    | Phe     | D-Lys | Ile      | Cl-Hty | Gly                 | Hph    | [12]    |
| Anabaenopeptin    | T      | Ile     | D-Lys | Val      | Hty    | MeHty               | Ile    | [41]    |
| Brunsvicamides    | A      | Ile     | Lys   | Val      | Leu    | MeTrp               | Phe    | [50]    |
| Brunsvicamides    | B      | Ile     | Lys   | Ile      | Leu    | MeTrp               | Phe    | [50]    |
| Brunsvicamides    | C      | Ile     | Lys   | Val      | Leu    | MeFormyl-kynurenine | Phe    | [50]    |
| Ferintoic Acid    | A      | Trp     | D-Lys | Val      | Hty    | MeAla               | Phe    | [39]    |
| Ferintoic Acid    | B      | Trp     | D-Lys | Allo-Ile | Hty    | MeAla               | Phe    | [39]    |
| Ferintoic Acid    | C      | Trp     | D-Lys | Met      | Hty    | MeAla               | Phe    | [78]    |
| Ferintoic Acid    | D      | Trp     | D-Lys | MetO     | Hty    | MeAla               | Phe    | [78]    |
| Lyngbyaureidamide | A      | D-Phe   | D-Lys | Ile      | Hty    | MeAla               | Hph    | [47]    |
| Lyngbyaureidamide | B      | D-Phe   | D-Lys | Ile      | Hty    | MeAla               | Phe    | [47]    |
| Namalide          | B      | Ile     | D-Lys | Ile      | Hty    | -                   | -      | [73]    |
| Namalide          | C      | Ile     | D-Lys | Val      | Hty    | -                   | -      | [73]    |
| Nodulapeptin      | 807    | Ile     | D-Lys | Val      | Hph    | MeHph               | Ser    | [49]    |
| Nodulapeptin      | 821    | Ile     | D-Lys | Ile      | Hph    | MeHph               | Ser    | [49]    |
| Nodulapeptin      | 823    | Ile     | D-Lys | Val      | Hph    | MeHty               | Ser    | [49]    |
| Nodulapeptin      | 839    | Ile     | D-Lys | Met      | Hph    | MeHph               | Ser    | [49]    |
| Nodulapeptin      | 849    | Ile     | D-Lys | Val      | Hph    | MeHph               | AcSer  | [49]    |
| Nodulapeptin      | 851    | Ile     | D-Lys | Val      | Hph    | MeHph               | Met    | [49]    |

|               |      |     |       |       |     |         |       |         |
|---------------|------|-----|-------|-------|-----|---------|-------|---------|
| Nodulapeptin  | 857  | Phe | D-Lys | Val   | Hph | MeHty   | Ser   | [34,49] |
| Nodulapeptin  | 863  | Ile | D-Lys | Ile   | Hph | MeHph   | AcSer | [49]    |
| Nodulapeptin  | 865  | Ile | D-Lys | Val   | Hph | MeHty   | AcSer | [34]    |
| Nodulapeptin  | 867  | Ile | D-Lys | Val   | Hph | MeHty   | Met   | [34]    |
| Nodulapeptin  | 869  | Phe | D-Lys | Val   | Leu | MeHty   | MetO  | [34]    |
| Nodulapeptin  | 871  | Ile | D-Lys | MetO  | Hph | MeHty   | Ser   | [14,73] |
| Nodulapeptin  | 879  | Ile | D-Lys | Ile   | Hph | MeHty   | AcSer | [14]    |
| Nodulapeptin  | 885  | Phe | D-Lys | Val   | Hph | MeHph   | Met   | [49]    |
| Nodulapeptin  | 897  | Ile | D-Lys | MetO  | Hph | MeHph   | AcSer | [14,73] |
| Nodulapeptin  | 901  | Phe | D-Lys | Val   | Hph | MeHty   | Met   | [14]    |
| Nodulapeptin  | 917  | Phe | D-Lys | Val   | Hph | MeHty   | MetO  | [14,34] |
| Nodulapeptin  | 931  | Ile | D-Lys | MetO  | Hph | MeHty   | MetO  | [14,34] |
| Nodulapeptin  | 933  | Phe | D-Lys | Val   | Hty | MeHty   | MetO  | [14,34] |
| Nodulapeptin  | 855A | Ile | D-Lys | Met   | Hph | MeHty   | Ser   | [14]    |
| Nodulapeptin  | 855B | Ile | D-Lys | MetO  | Hph | MeHph   | Ser   | [14]    |
| Nodulapeptin  | 855C | Phe | D-Lys | Val   | Val | MeHty   | MetO  | [34]    |
| Nodulapeptin  | 881A | Ile | D-Lys | Met   | Hph | MeHph   | AcSer | [14,34] |
| Nodulapeptin  | 881B | Ile | D-Lys | Ile   | Hph | MeHty   | Met   | [14,34] |
| Nodulapeptin  | 883A | Ile | D-Lys | Met   | Hph | MeHph   | Met   | [14,85] |
| Nodulapeptin  | 883B | Phe | D-Lys | Val   | Hph | MeHph   | AcSer | [14]    |
| Nodulapeptin  | 883C | Ile | D-Lys | Val   | Hph | MeHty   | MetO  | [34]    |
| Nodulapeptin  | 899A | Ile | D-Lys | Met   | Hph | MeHty   | Met   | [14,34] |
| Nodulapeptin  | 899B | Phe | D-Lys | Val   | Hph | MeHty   | AcSer | [14,34] |
| Nodulapeptin  | 899C | Ile | D-Lys | Val   | Hty | MeHty   | MetO  | [34]    |
| Nodulapeptin  | 915A | Ile | D-Lys | MetO  | Hph | MeHty   | Met   | [14,73] |
| Nodulapeptin  | 915B | Phe | D-Lys | Val   | Hty | MeHty   | AcSer | [14]    |
| Nodulapeptin  | A    | Ile | D-Lys | MetO2 | Hph | MeHty   | AcSer | [48]    |
| Nodulapeptin  | B    | Ile | D-Lys | MetO  | Hph | MeHty   | AcSer | [14,48] |
| Nodulapeptin  | C    | Ile | D-Lys | Met   | Hph | MeHty   | AcSer | [14]    |
| Oscillamide   | B    | Arg | D-Lys | Met   | Hty | MeAla   | Phe   | [25]    |
| Oscillamide   | Y    | Tyr | D-Lys | Ile   | Hty | MeAla   | Phe   | [36]    |
| Pompanopeptin | B    | Ile | Lys   | Val   | Hty | MeAhpha | Hty   | [23]    |
| Schizopeptin  | 791  | Ile | D-Lys | Ile   | Hph | MeAla   | Phe   | [46]    |

AcSer: Acetyl Serine; Ala: Alanine; Allo-Ile: Allo-isoleucine; Arg: Arginine; Asn: Asparagine; Cl-Hty: 2-Chloro-Homotyrosine; D-Phe: D-Phenylalanine; EtHph: N-Ethyl-Homophenylalanine; Gly: Glycine; Harg: Homoarginine; Hph: Homophenylalanine; Hty: Homotyrosine; Ile: Isoleucine; Leu: Leucine; Lys: Lysine; MeAhpha: N-Methyl-2-amino-6-(40-hydroxyphenyl) hexanoic acid; MeAla: Methyl-Alanine; MeAsn: Methyl-Asparagine; MeFormyl-kynurenine: N-Methyl-N'-formyl-D-kynurenine; MeGly: Methyl Glycine; MeHph: Methyl-Homophenylalanine; MeHty: Methyl-Tyrosine; MeIle: Methyl-Isoleucine; MeLeu: Methyl-Leucine; MePhe: Methyl-Phenylalanine; Met: Methionine; MetO: Methionine sulfoxide; MetO2: Methionine sulfone; MeTrp: Methyl-Tryptophan; O-MeArg: O-Methyl-Arginine; O-MeGlu: Methoxy-Glutamate; Phe: Phenylalanine; PNL: 6-Phenylnorleucine; PNV: 5-Phenylnorvaline; Ser: Serine; Trp: Tryptophan; Tyr: Tyrosine and Val: Valine.
